# Supplementary material
Source: Springer Nature journal article supplement (https://www.springermedizin.de/resource/supplementary/12913_2011_1938_MOESM3_ESM.pdf/9529992)
Supplement: MOESM3 [file 9529992]

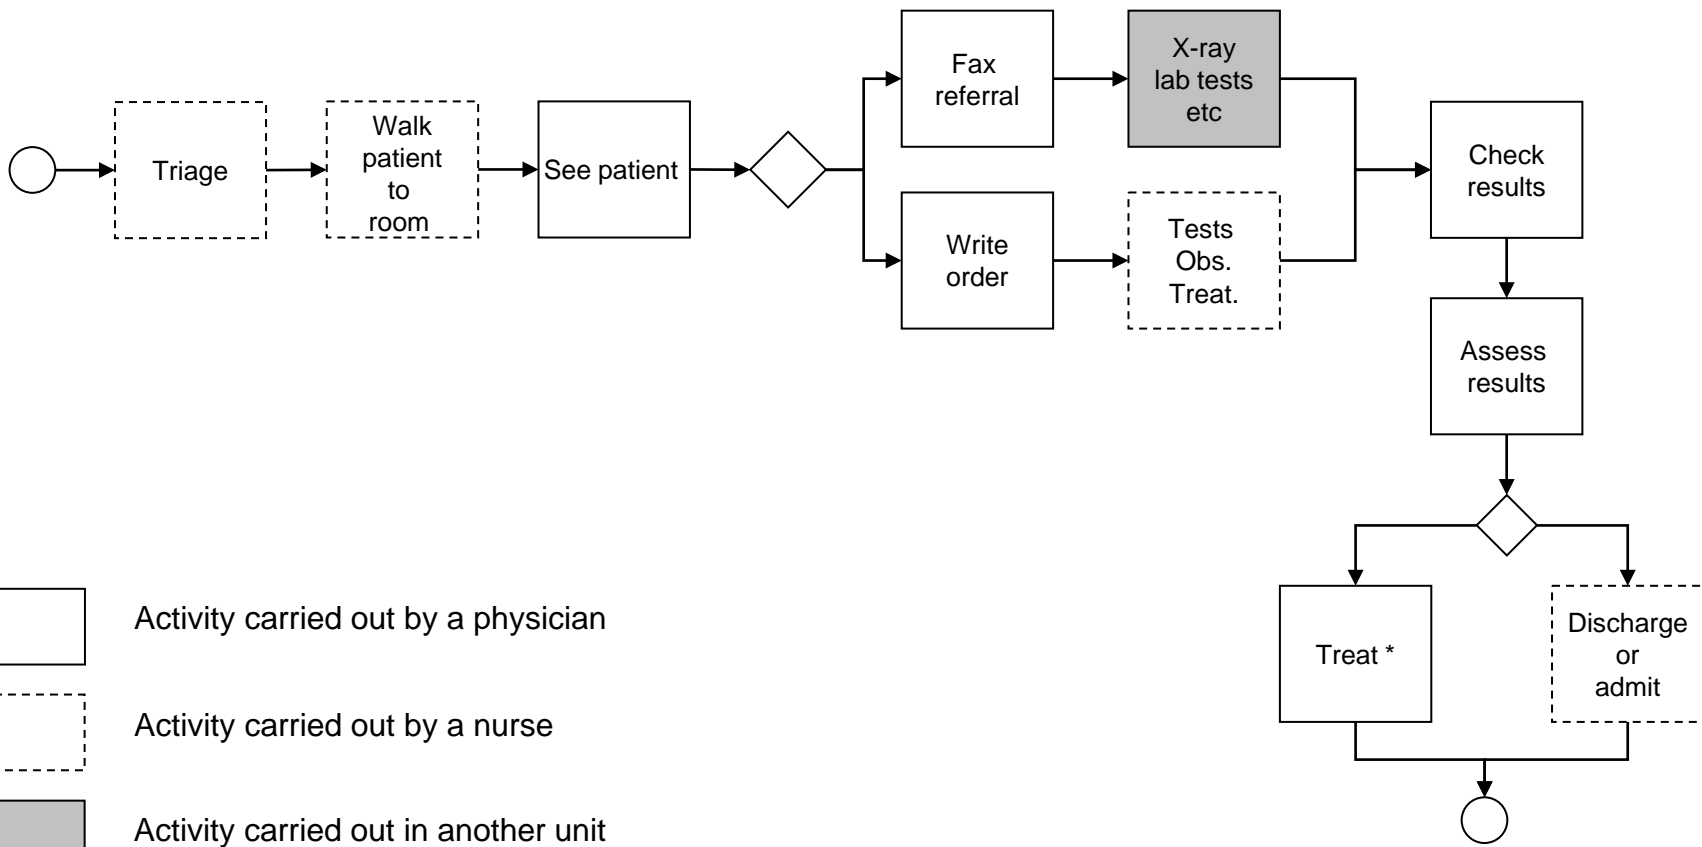

 Activity carried out by a physician

 Activity carried out by a nurse

 Activity carried out in another unit

 Decision point

 Start and end point

\* Can be a nurse or a physician activity
